# Supplementary material for: Neutralization-guided design of HIV-1 envelope trimers with high affinity for the unmutated common ancestor of CH235 lineage CD4bs broadly neutralizing antibodies
Source: PubMed Central journal article supplement (PMC6764681; doi:10.1371/journal.ppat.1008026), 2019-09-17

# S1A Fig. Neutralization by CH103\_UCA\_4A.

## 293T

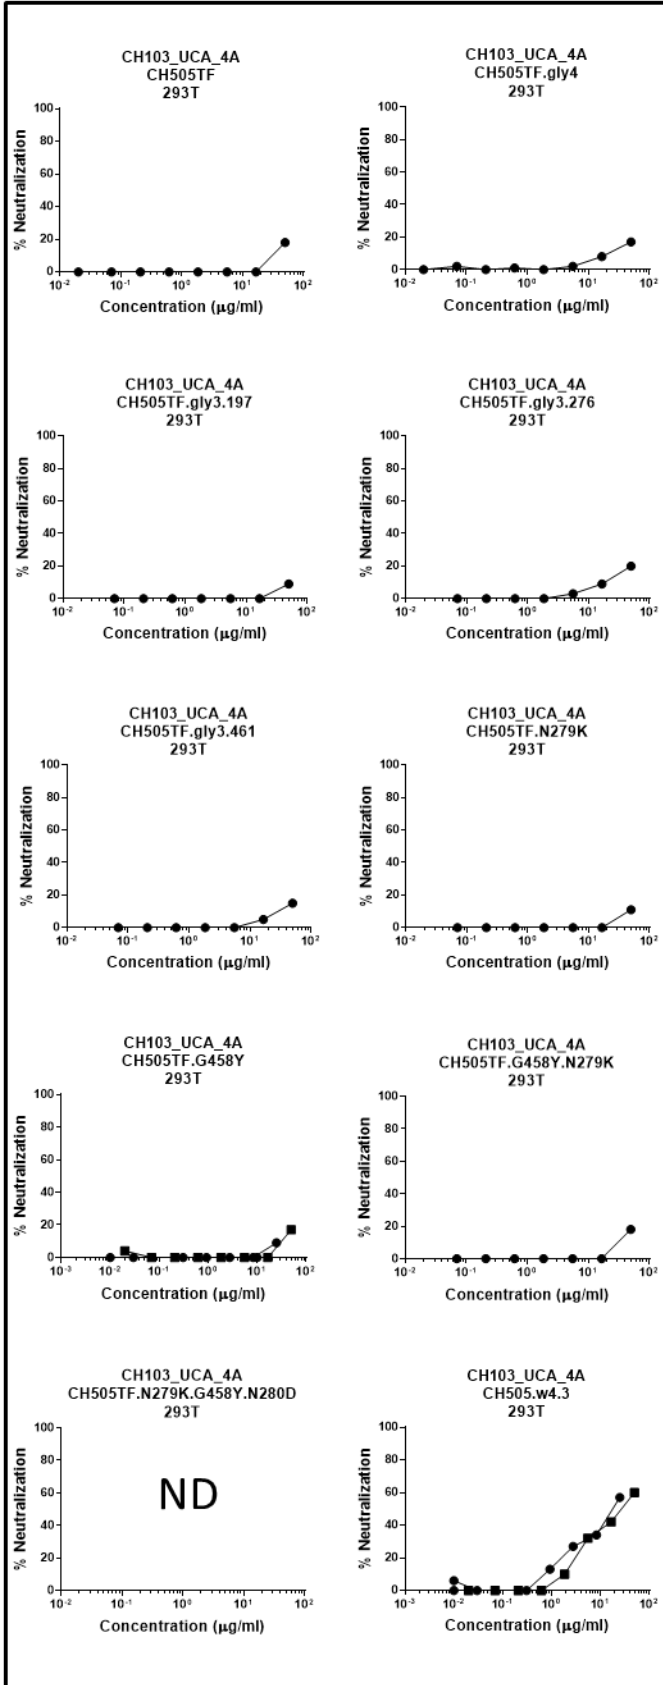

## GnT1-

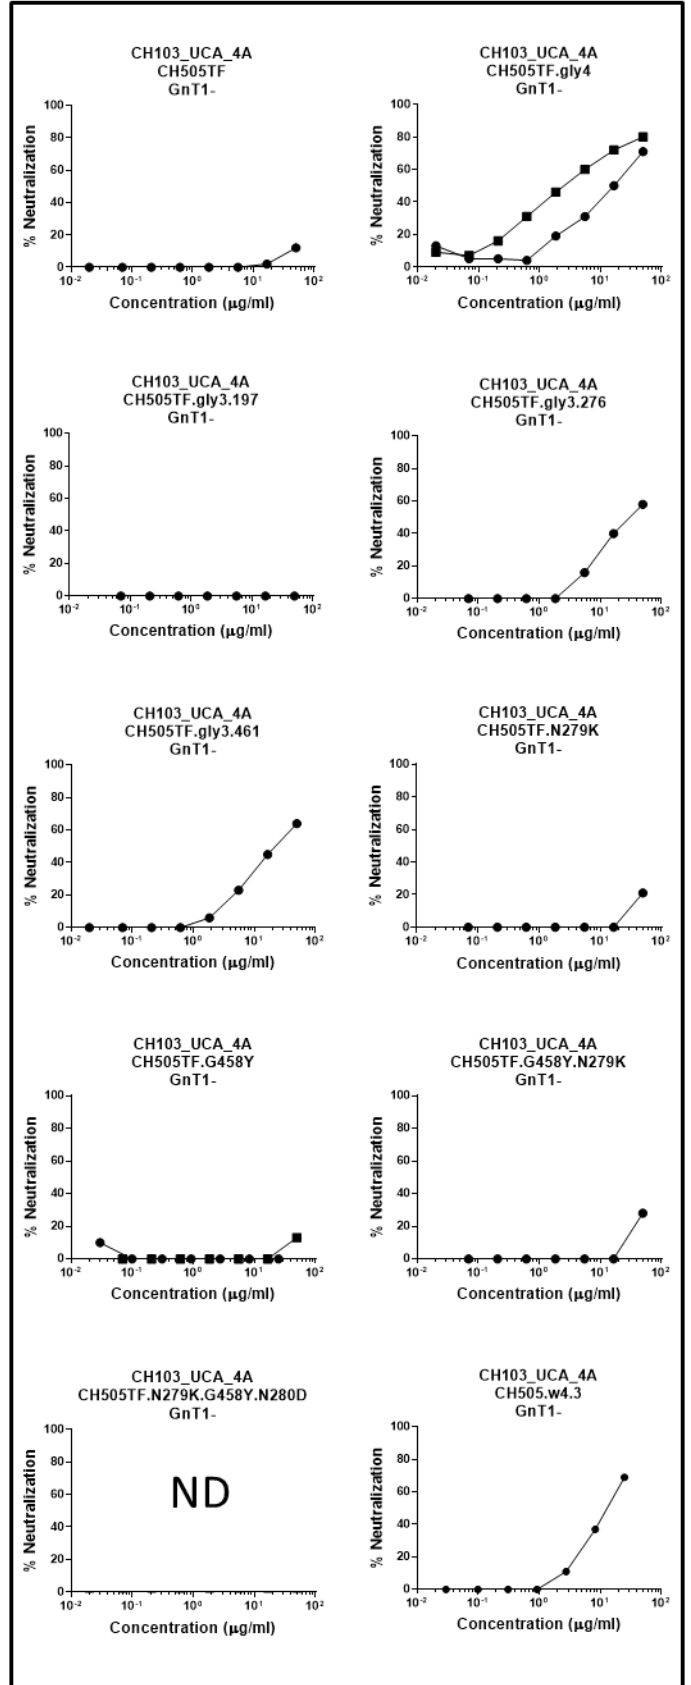

# S1B Fig. Neutralization by CH103\_IA\_9\_4A.

## 293T

## GnT1-

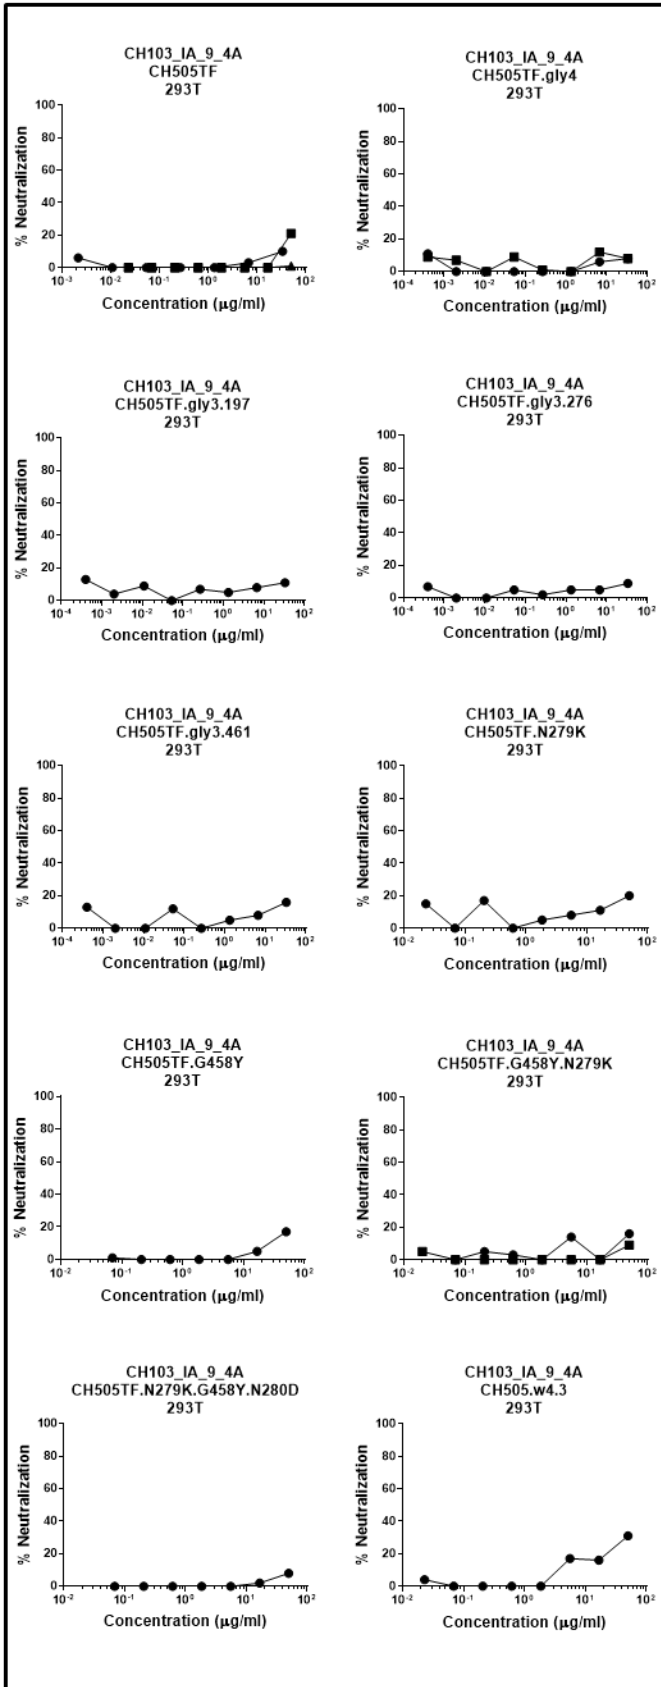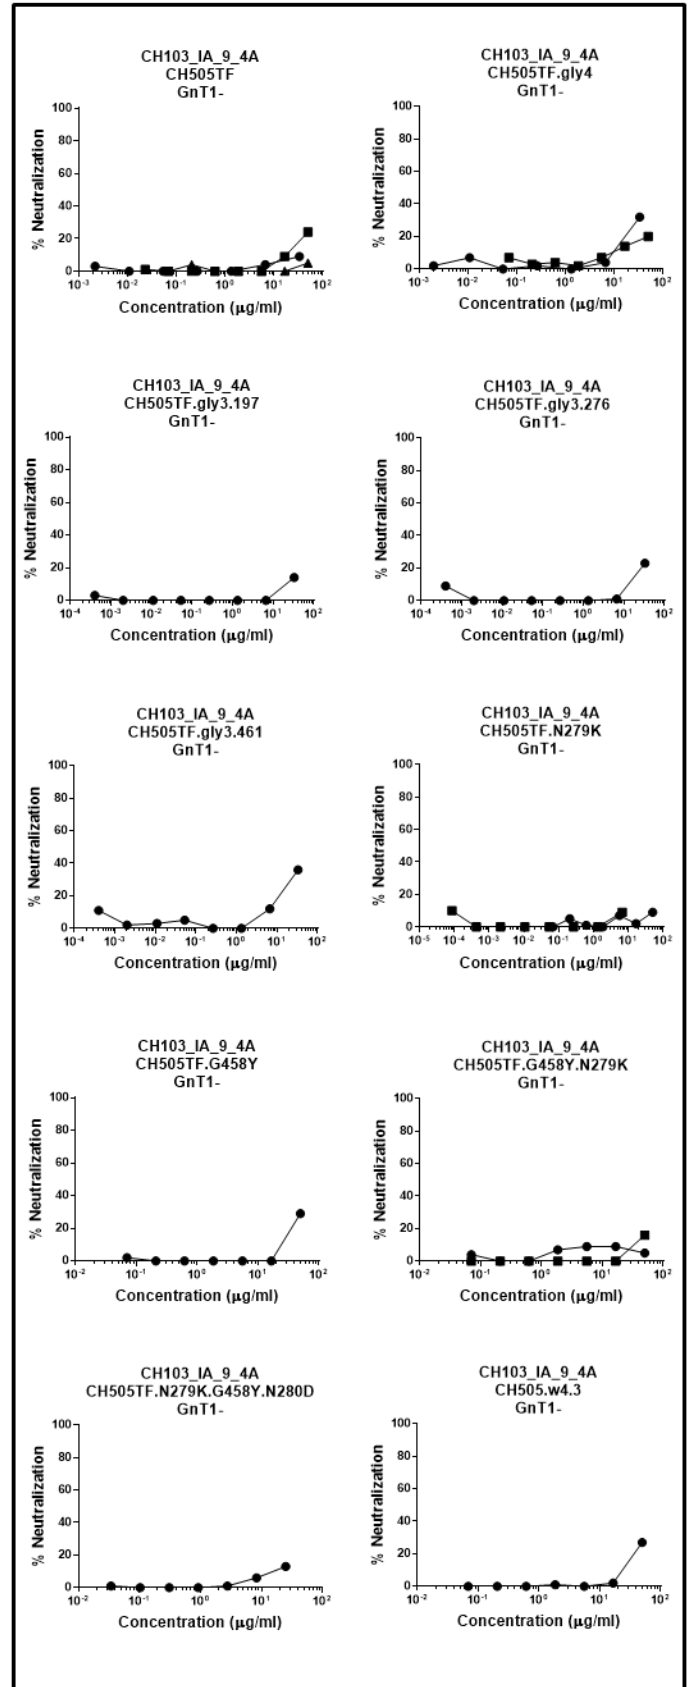

# S1C Fig. Neutralization by CH103\_IA\_8\_4A.

## 293T

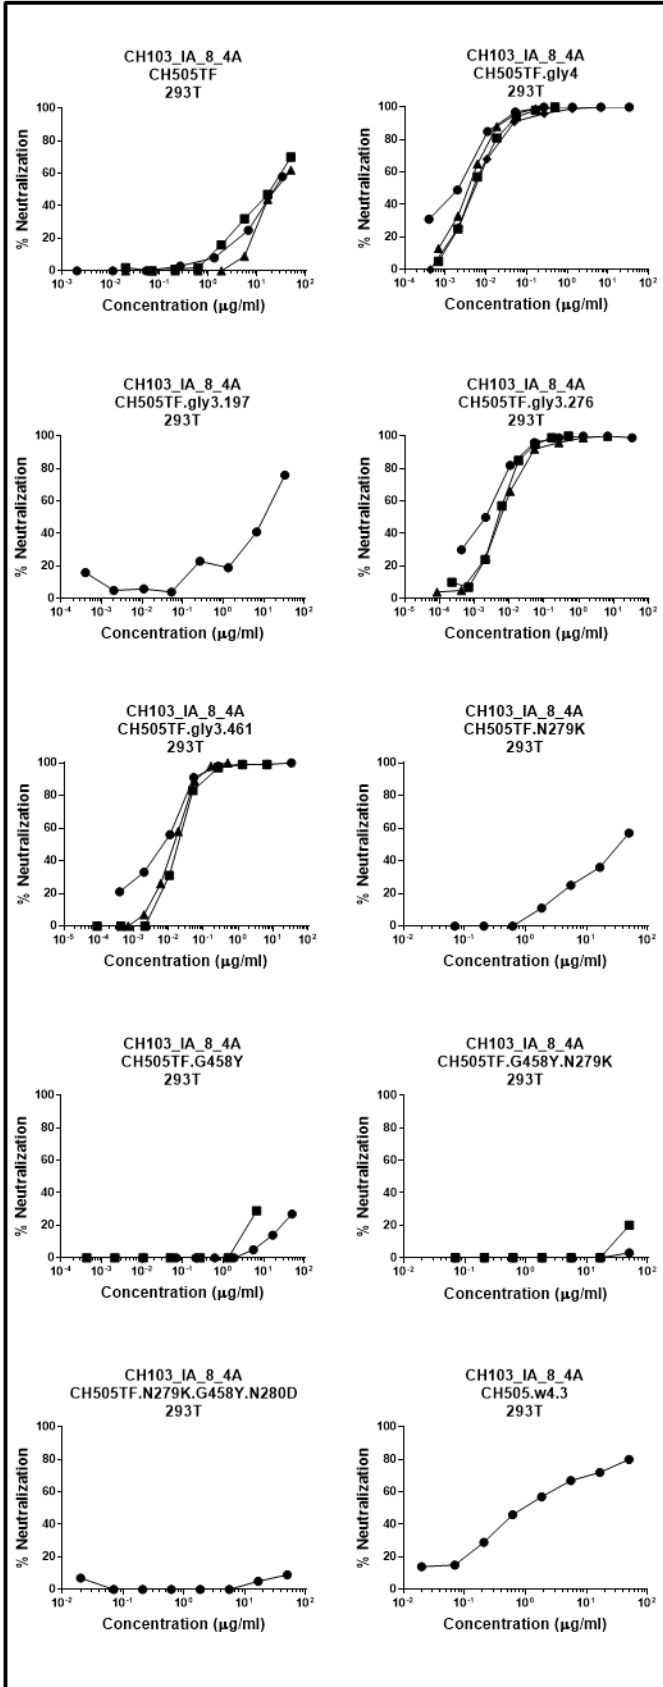

## GnT1-

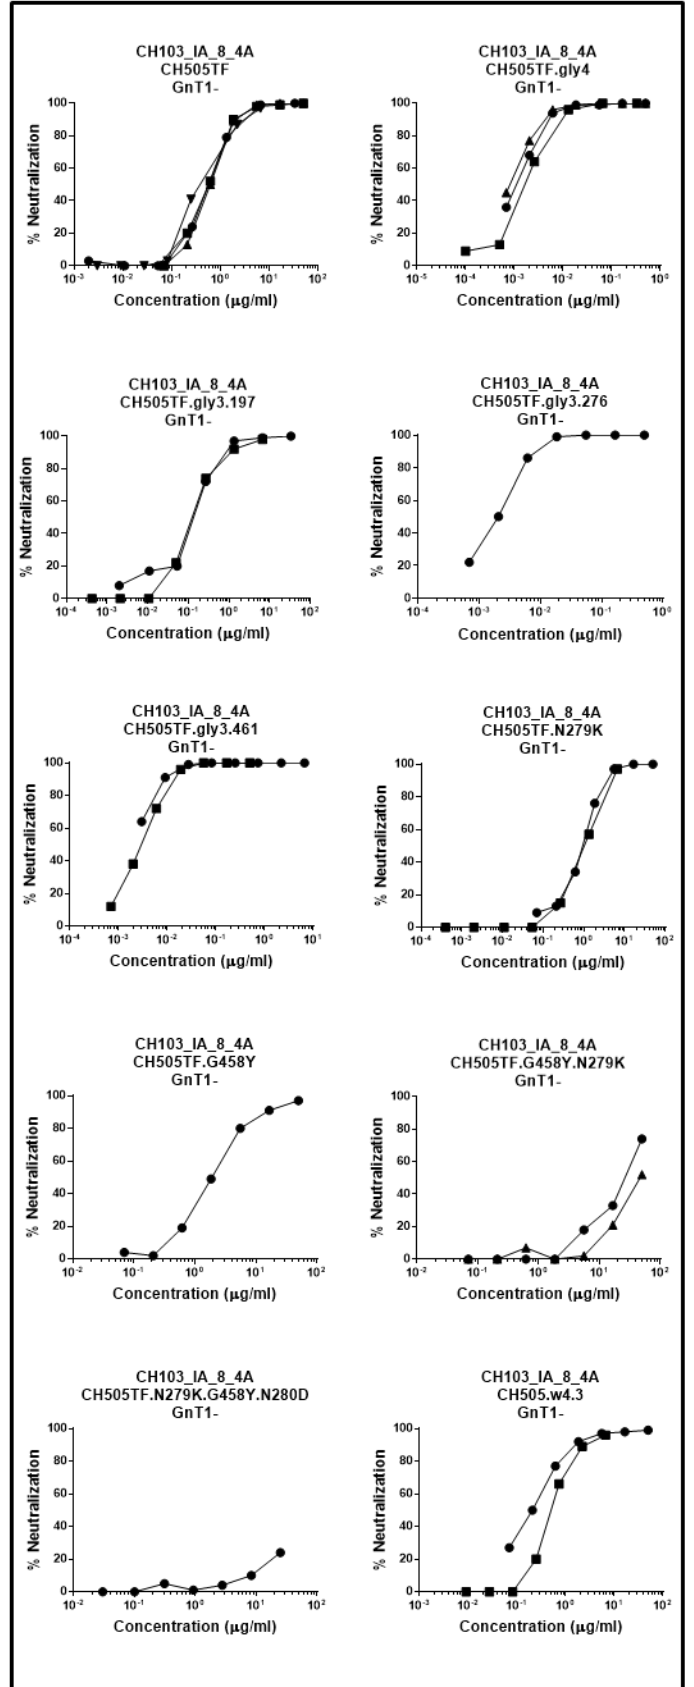

# S1D Fig. Neutralization by CH103\_IA\_7\_4A.

## 293T

## GnT1-

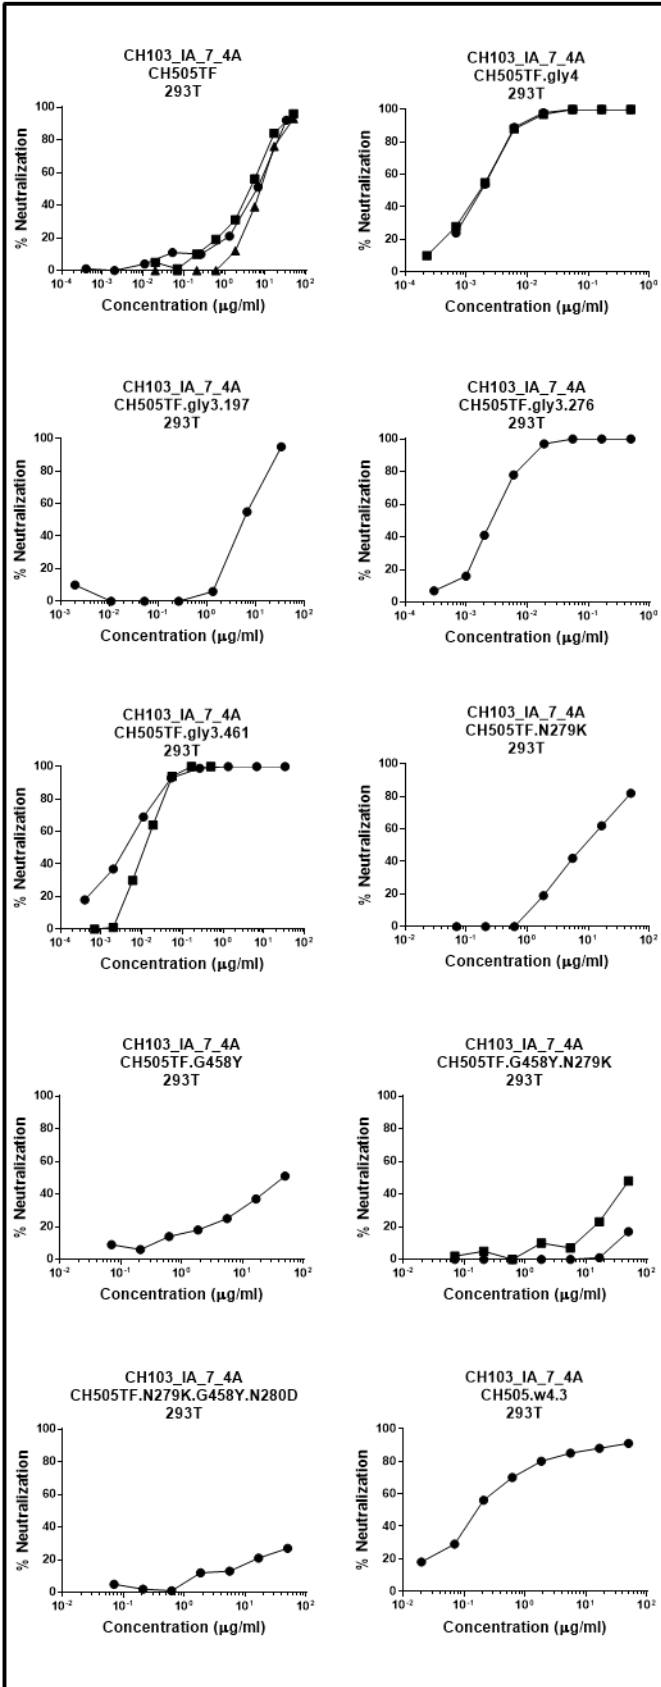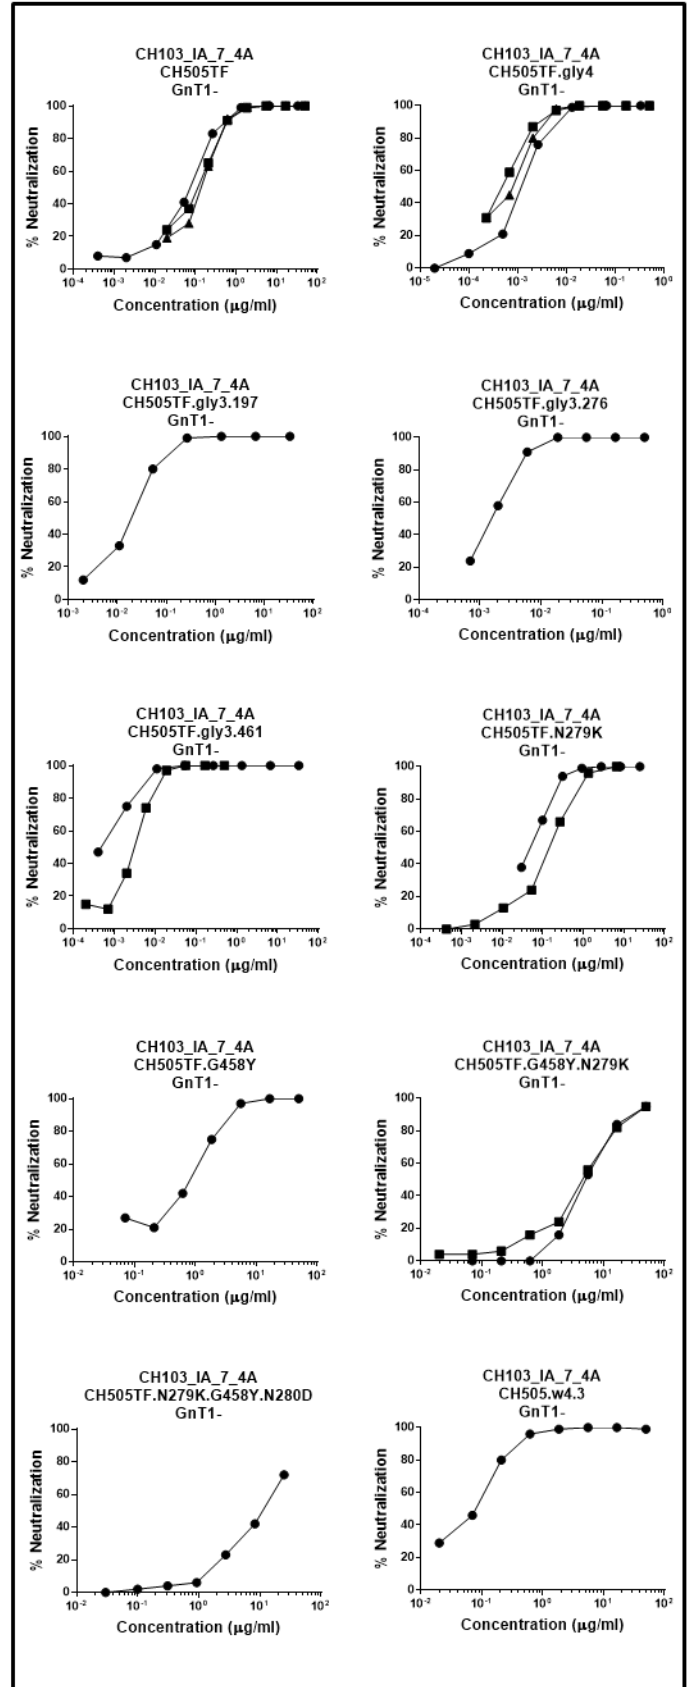

# S1E Fig. Neutralization by CH103\_IA\_6\_4A.

## 293T

## GnT1-

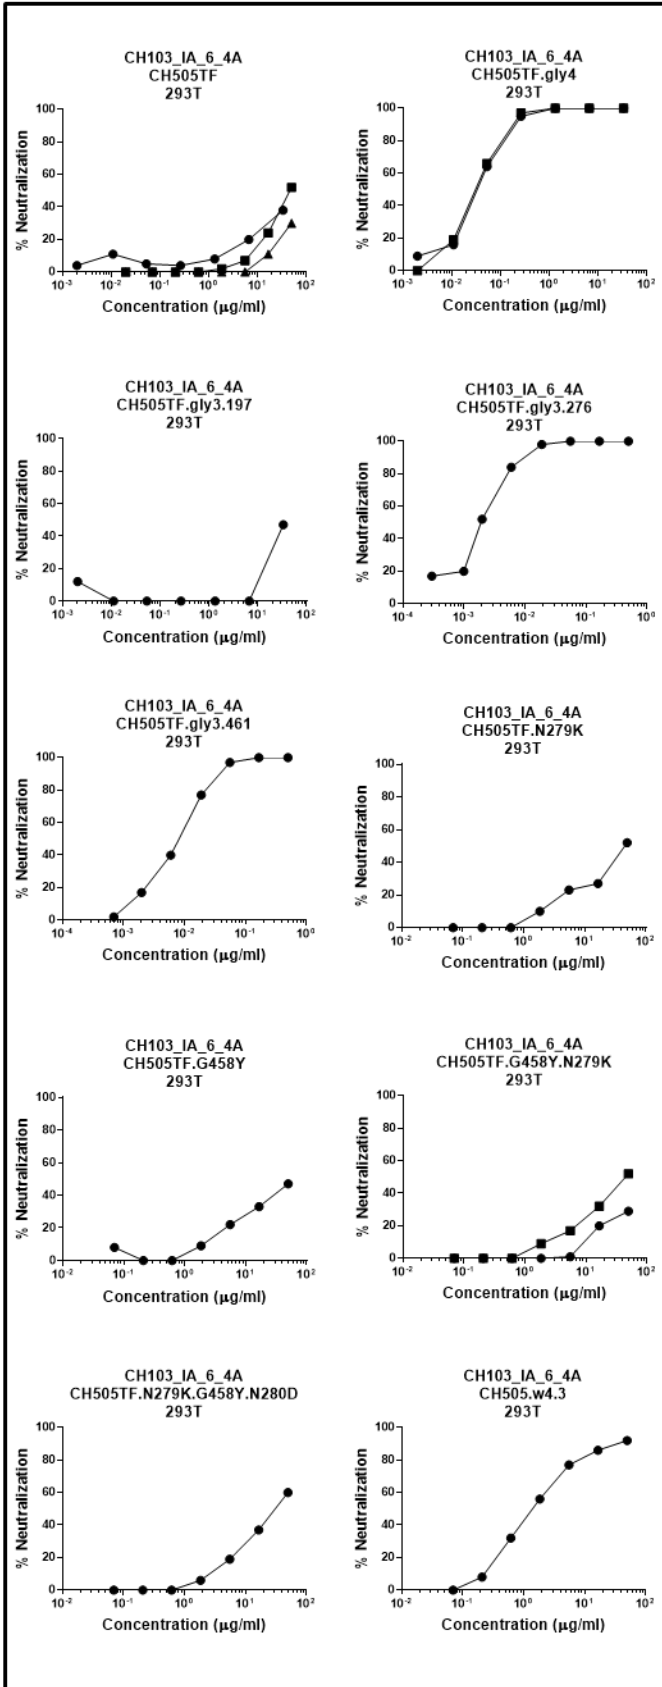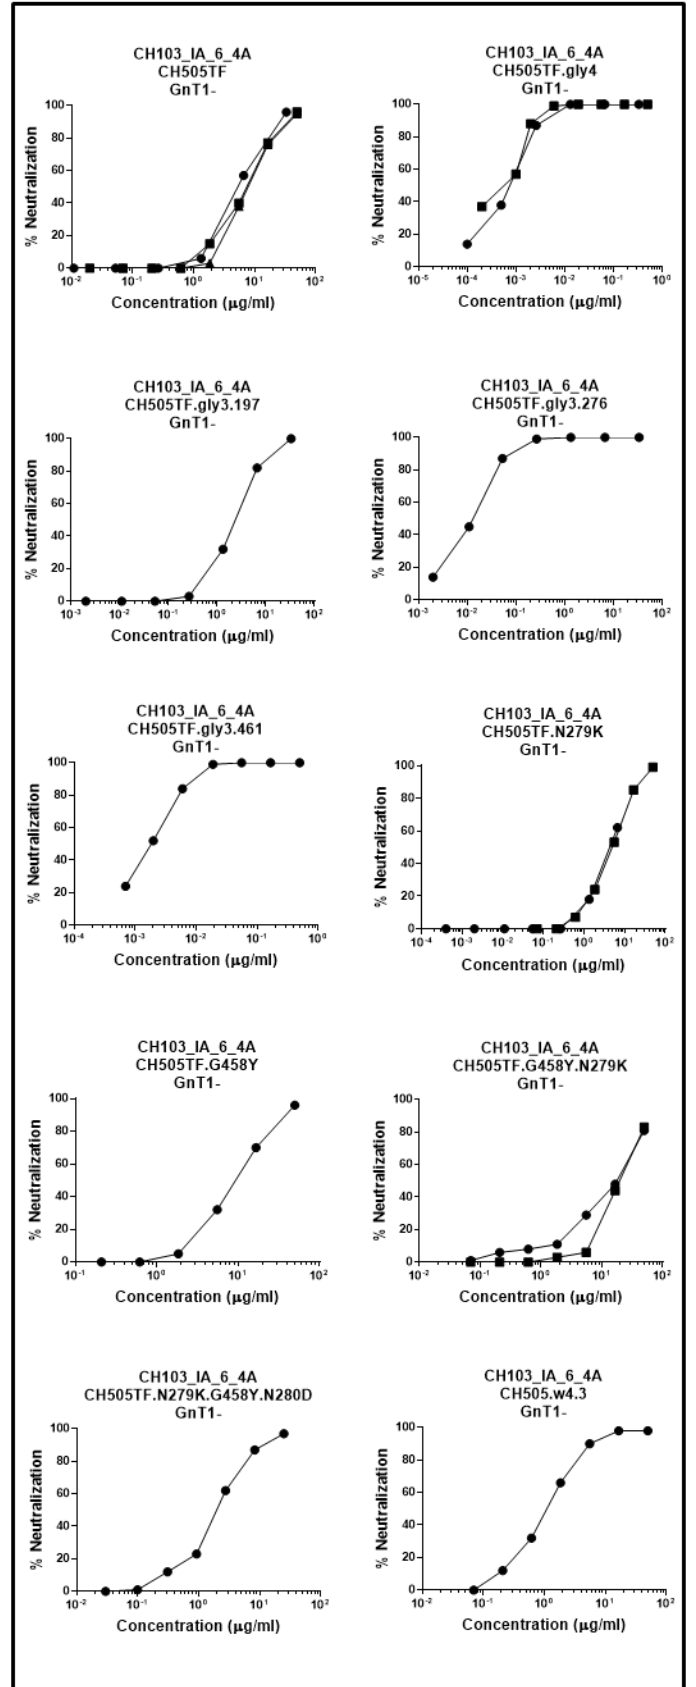

# S1F Fig. Neutralization by CH103\_IA\_5\_4A.

## 293T

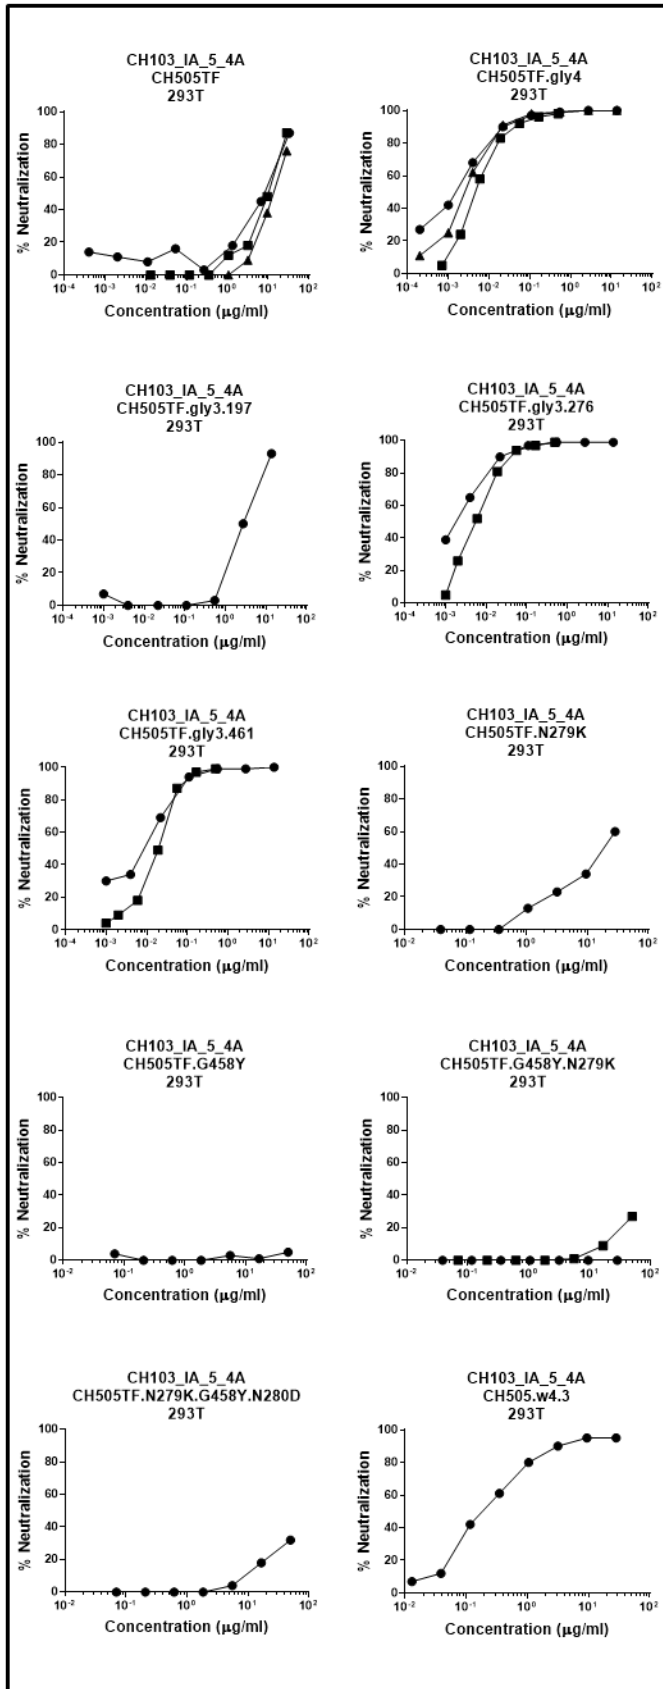

## GnT1-

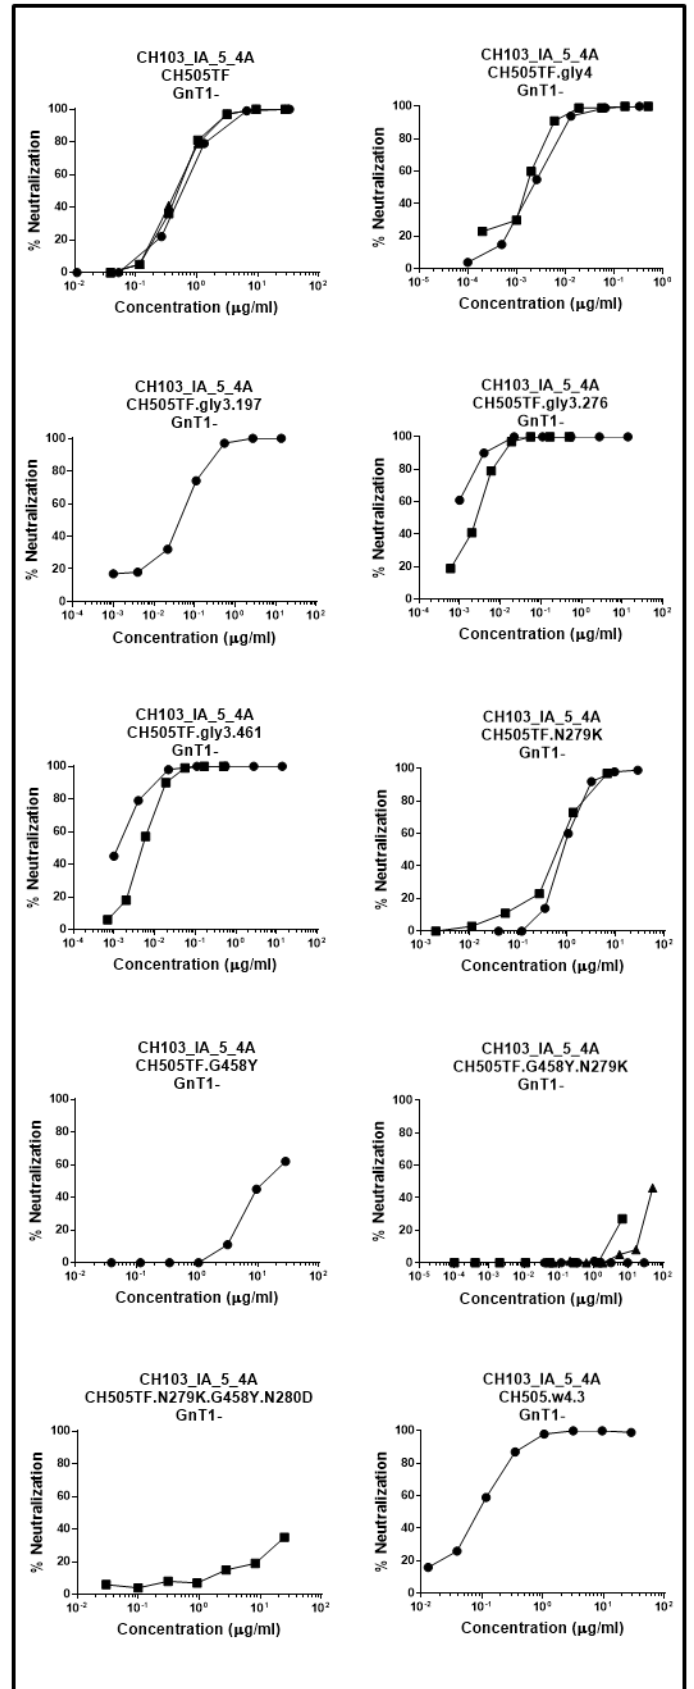

# S1G Fig. Neutralization by CH103\_IA\_4\_4A.

## 293T

## GnT1-

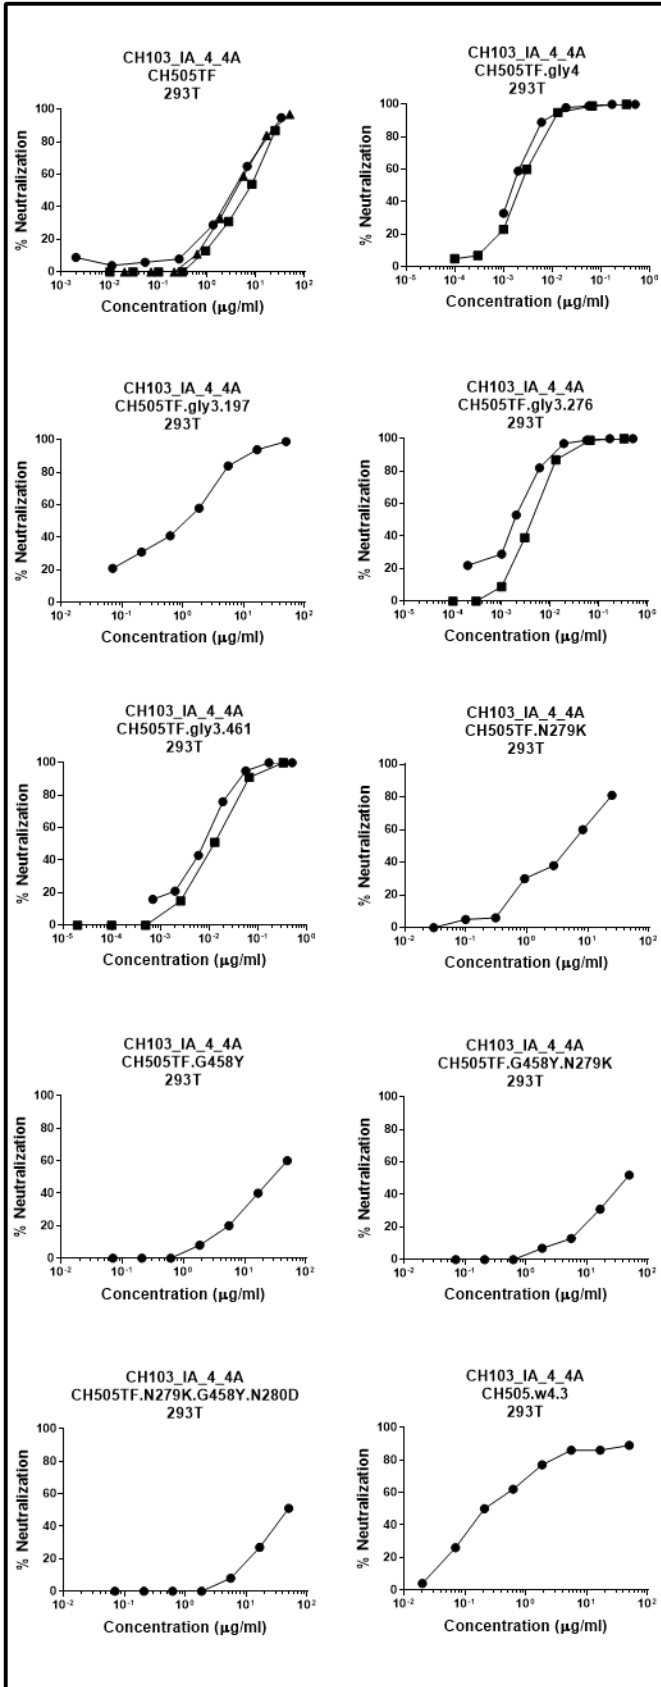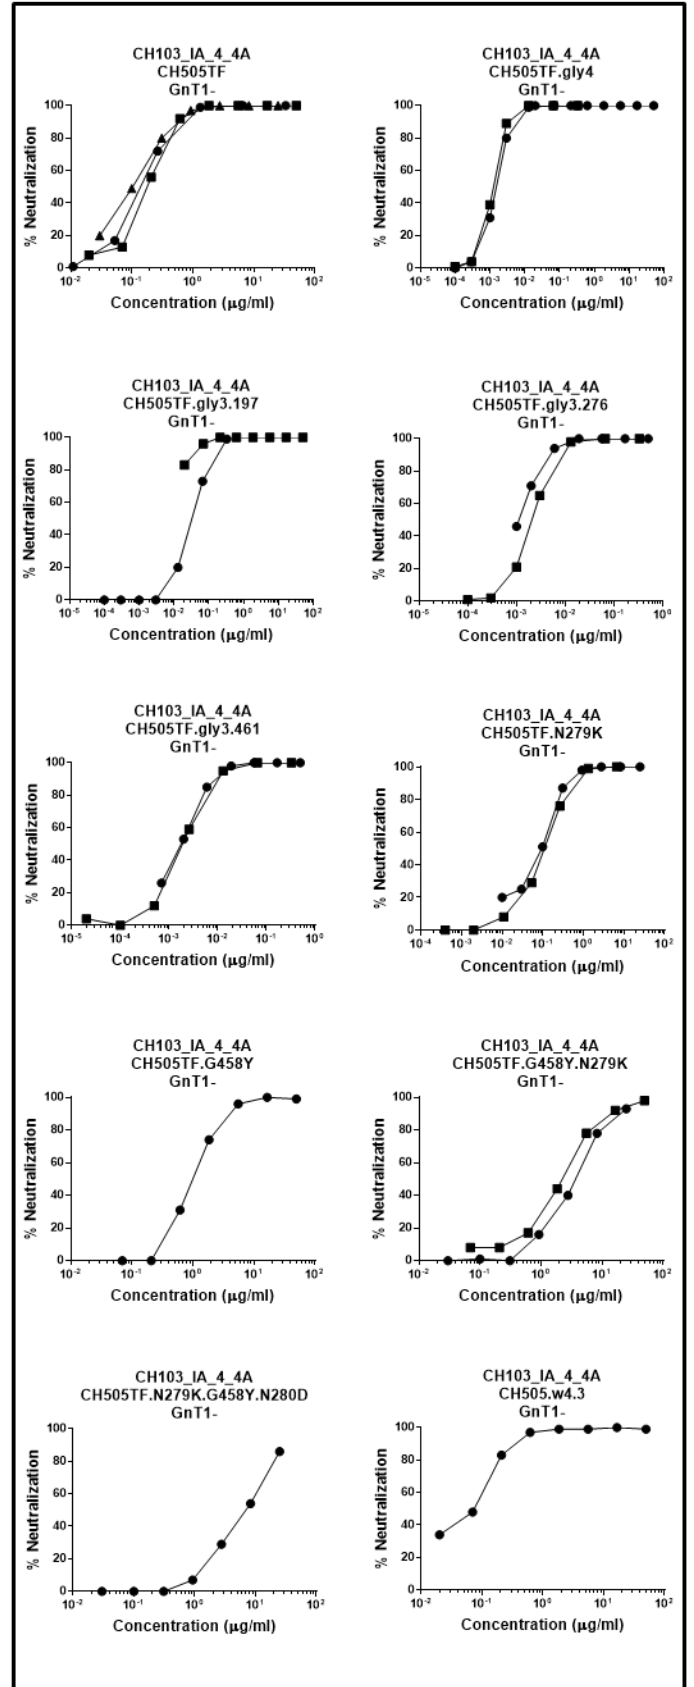

# S1H Fig. Neutralization by CH235 UCA2

## 293T

## GnT1-

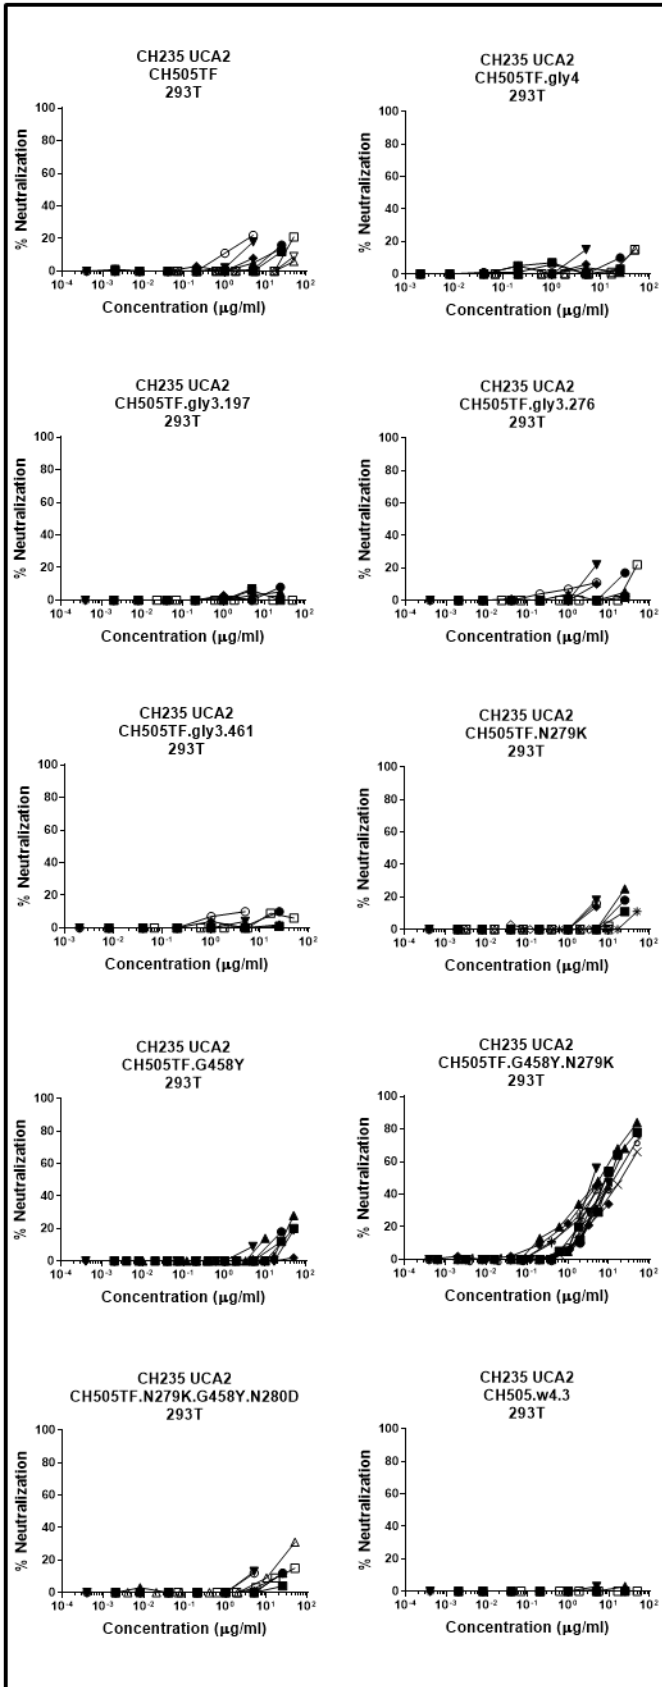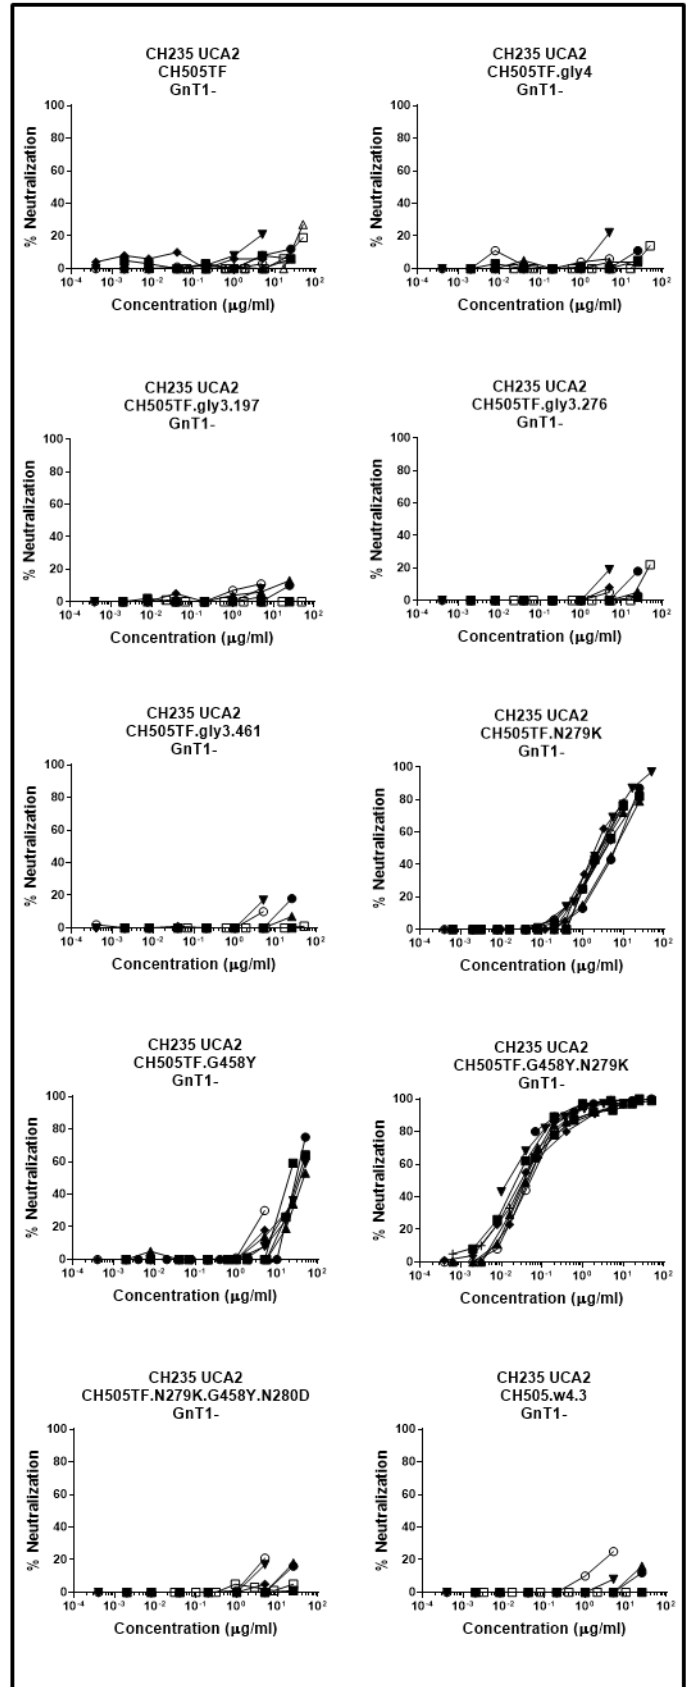



# S1I Fig. Neutralization by CH235\_I4\_v2\_4A

## 293T

## GnT1-

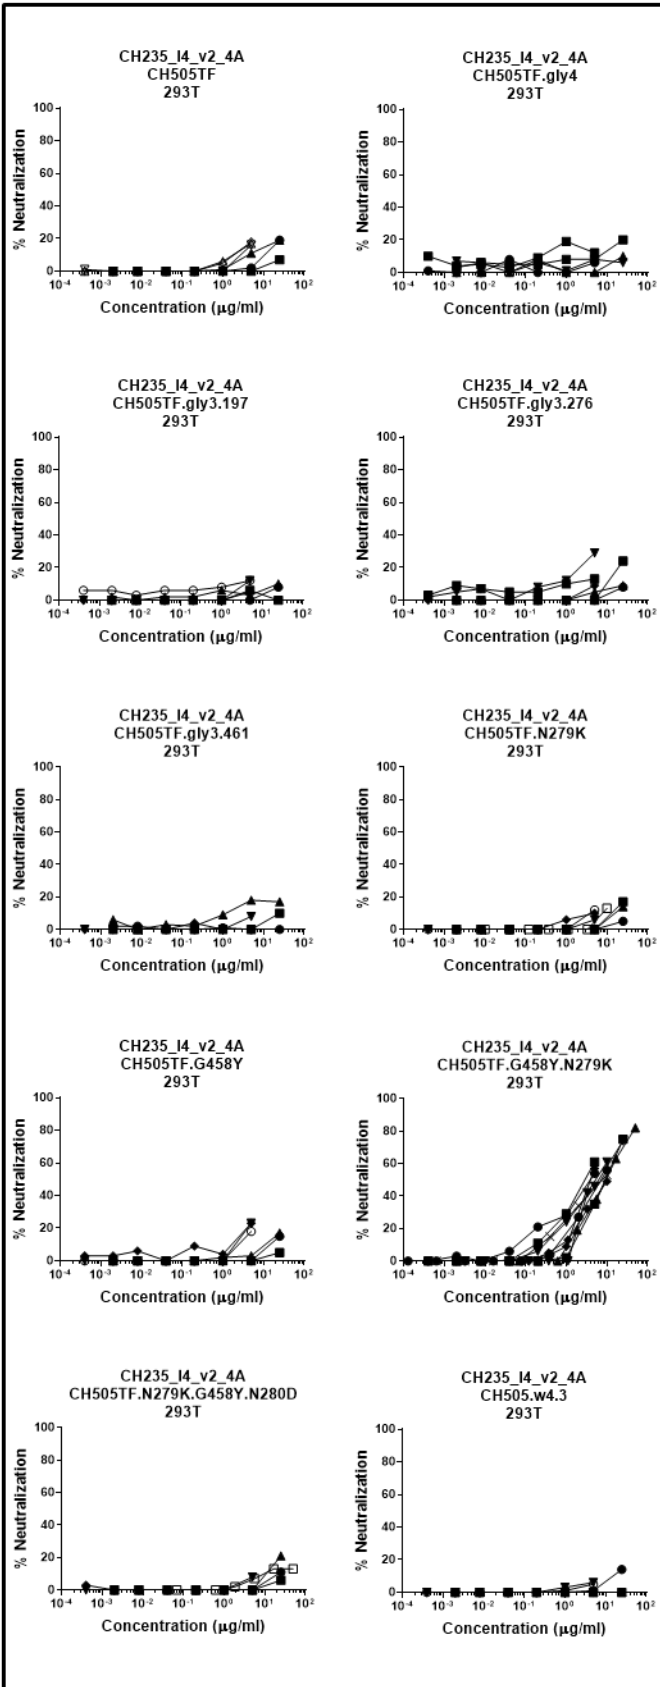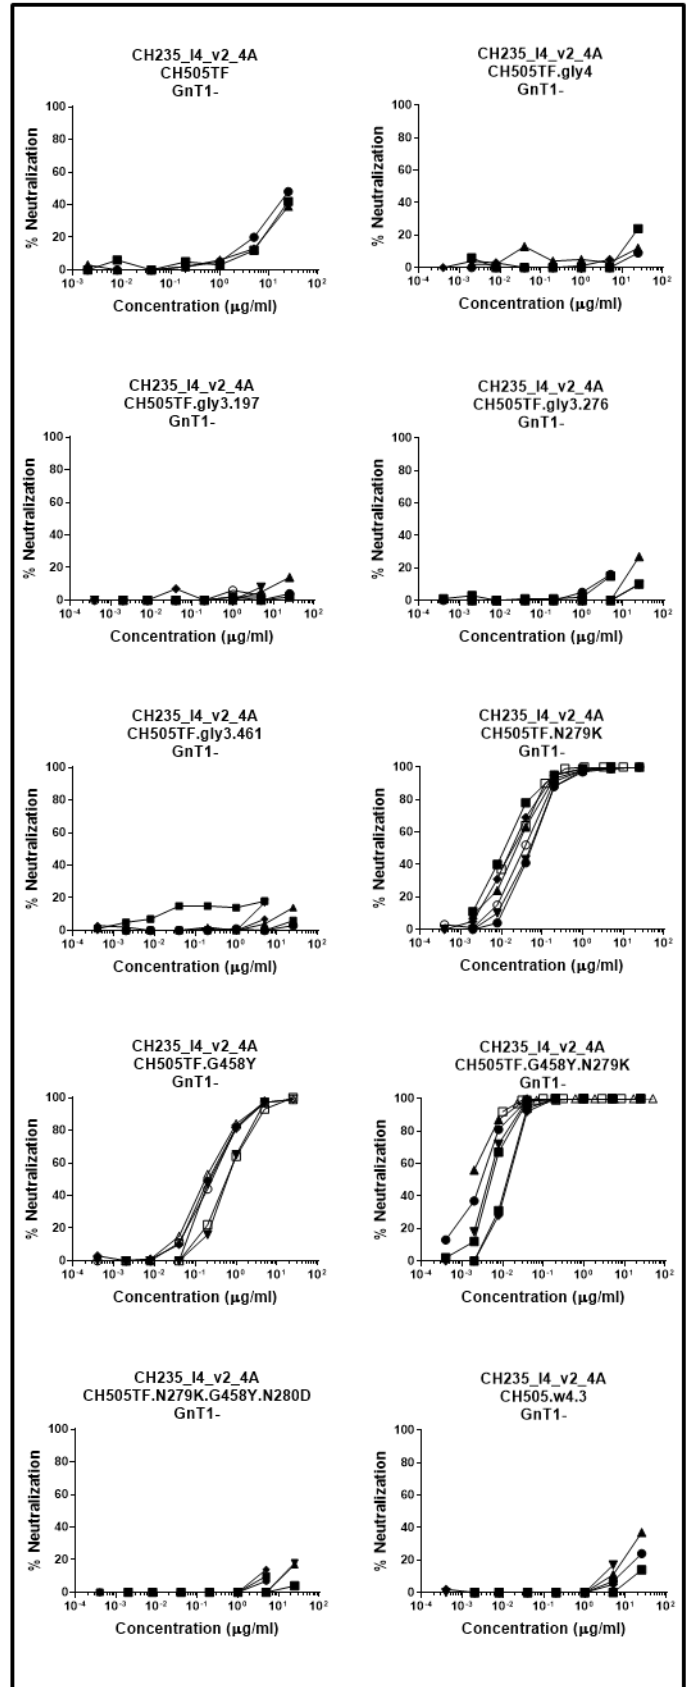

# S1J Fig. Neutralization by CH235\_I3\_v2\_4A

## 293T

## GnT1-

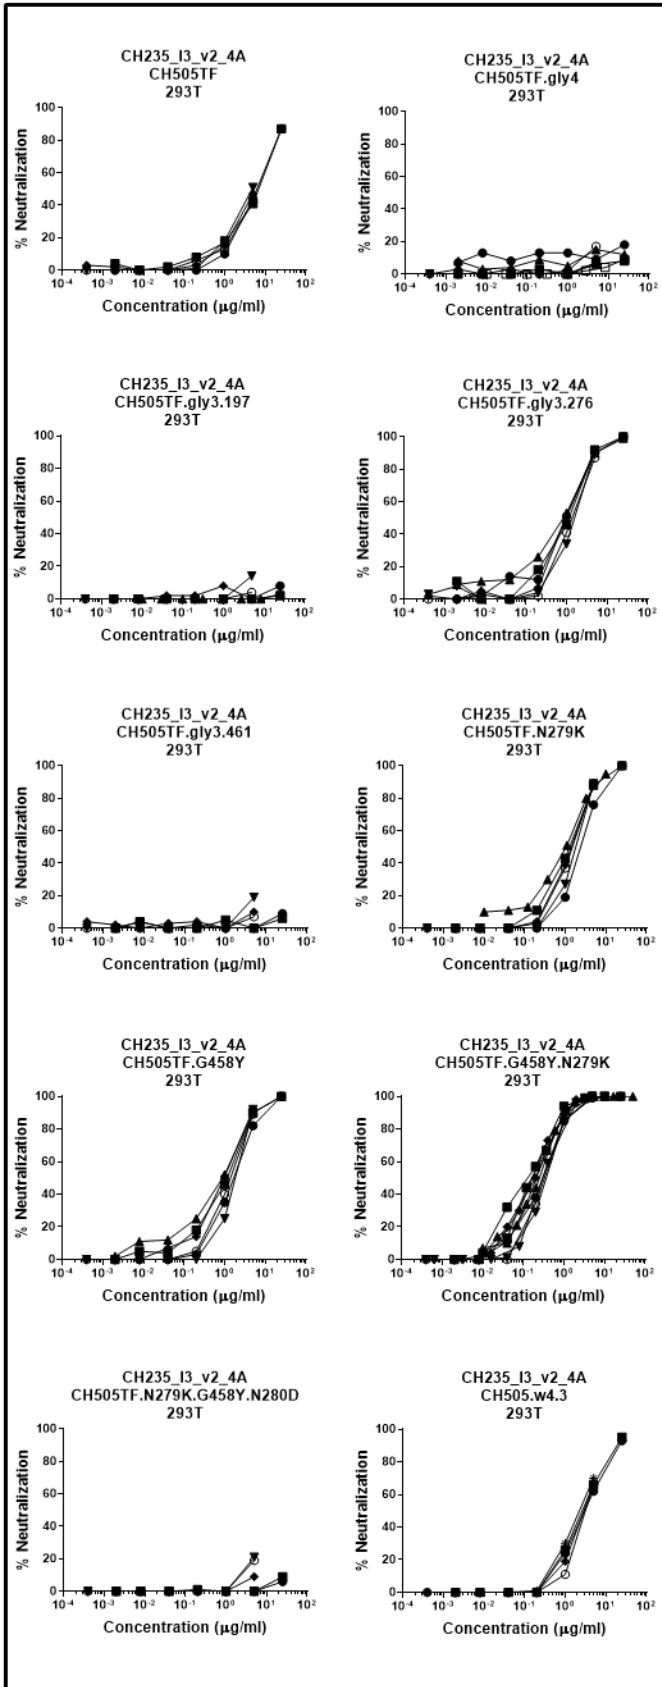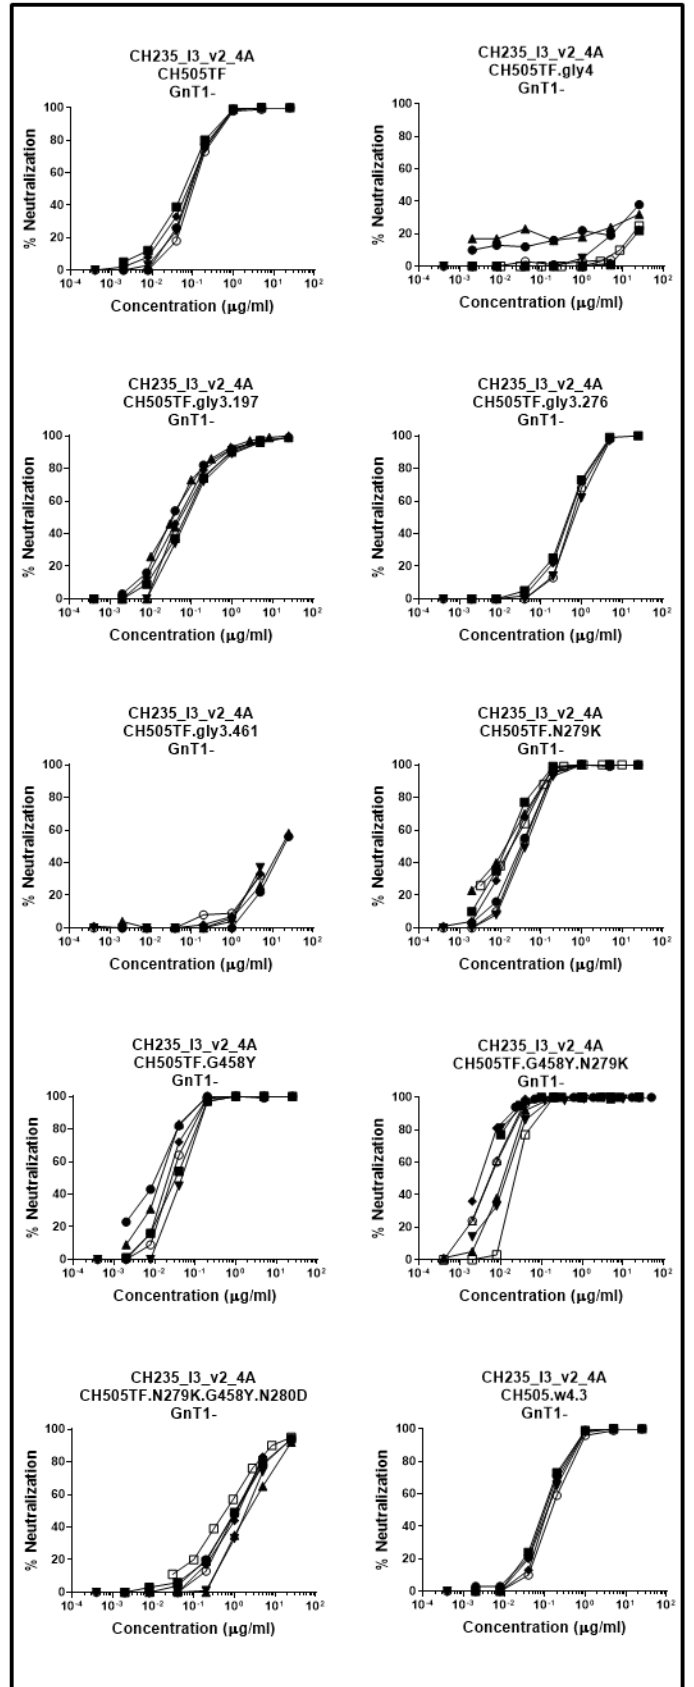

# S1K Fig. Neutralization by CH235\_I1\_v2\_4A

## 293T

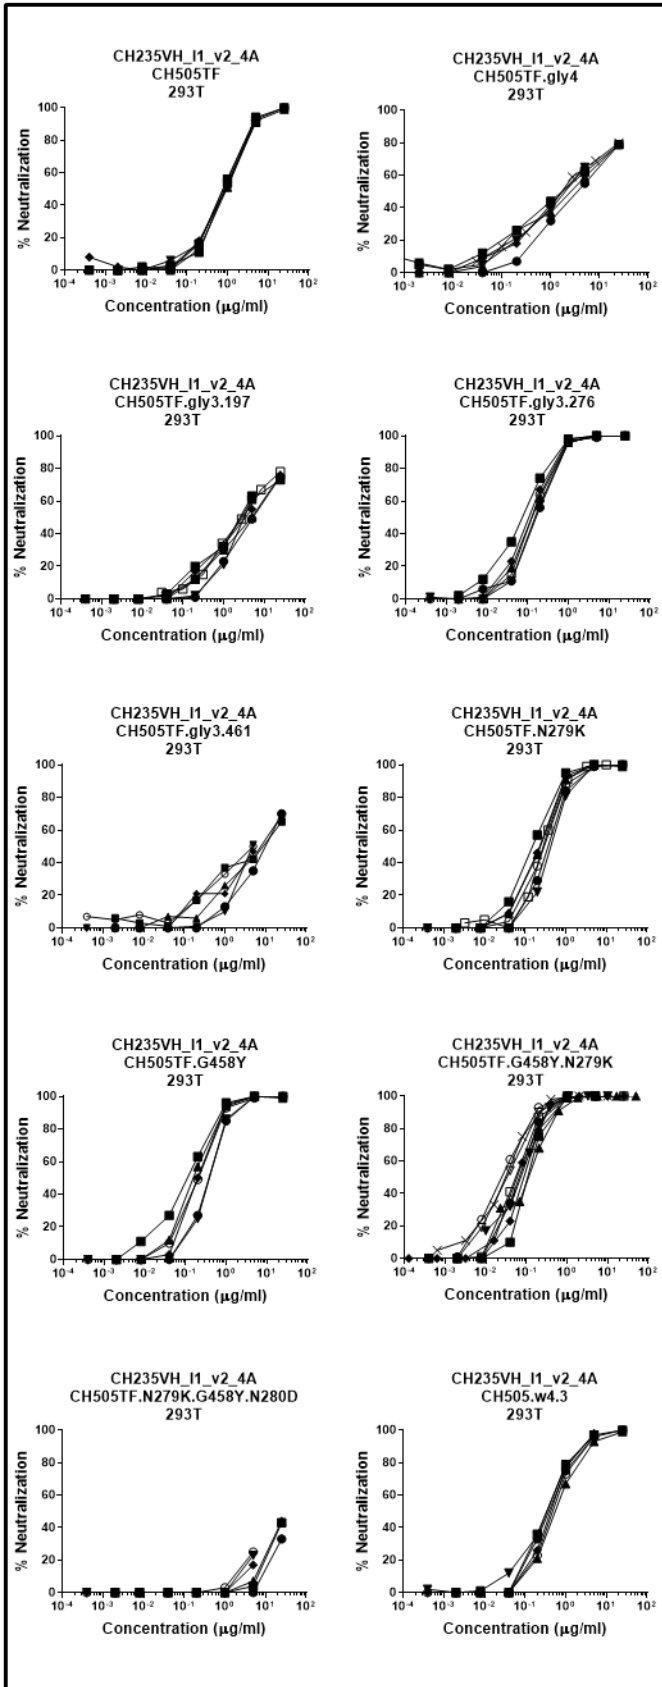

## GnT1-

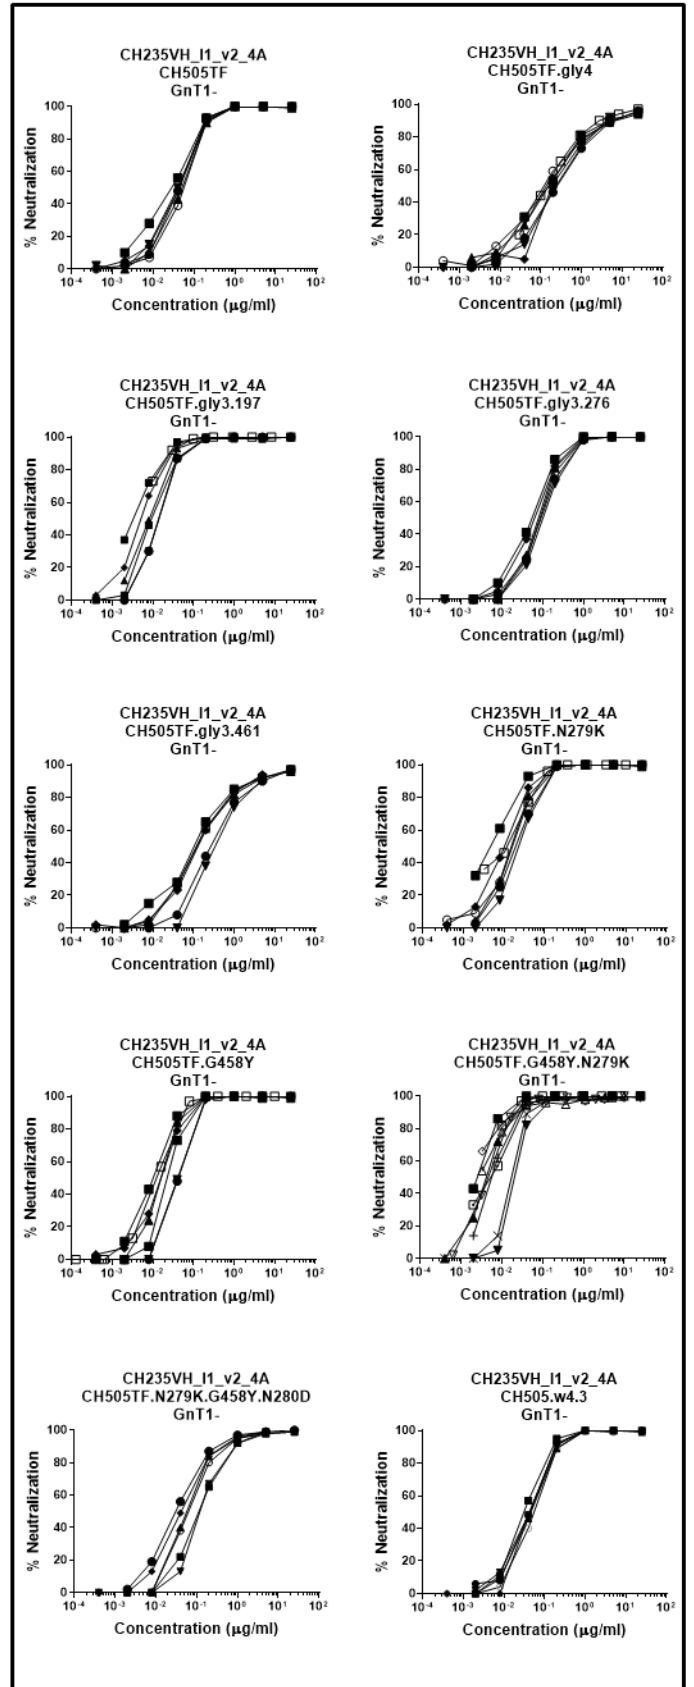

Supplement: ppat.1008026.s005.pdf [file ppat.1008026.s005.pdf]
