# Supplementary material for: Neutralization-guided design of HIV-1 envelope trimers with high affinity for the unmutated common ancestor of CH235 lineage CD4bs broadly neutralizing antibodies
Source: PubMed Central journal article supplement (PMC6764681; doi:10.1371/journal.ppat.1008026), 2019-09-17
Supplement: ppat.1008026.s001.pdf [file ppat.1008026.s001.pdf]

**S1 Table. Infectivity of Env-pseudotyped viruses in TZM-bl cells.<sup>1</sup>**

| Virus                     | Virus dilution yielding<br>150,000 RLU |                 | Relative<br>infectivity <sup>2</sup> |       | RLU (undiluted virus) <sup>3</sup> |           |
|---------------------------|----------------------------------------|-----------------|--------------------------------------|-------|------------------------------------|-----------|
|                           | 293T                                   | GnT1-           | 293T                                 | GnT1- | 293T                               | GnT1-     |
| CH505TF                   | 499                                    | 47              | 1                                    | 1     | ND <sup>5</sup>                    | 1,324,808 |
| CH505TF.gly4              | 175                                    | 25              | 0.35                                 | 0.53  | 2,061,808                          | 1,088,156 |
| CH505TF.gly3.197          | 853                                    | 45              | 1.71                                 | 0.96  | ND                                 | 1,489,136 |
| CH505TF.gly3.276          | 230                                    | 32              | 0.46                                 | 0.68  | ND                                 | 1,165,652 |
| CH505TF.gly3.461          | 179                                    | 10              | 0.36                                 | 0.21  | 1,984,298                          | 879,184   |
| CH505TF.G458Y             | 9                                      | 1               | 0.02                                 | 0.02  | 671,616                            | 230,418   |
| CH505TF.N279K             | 45                                     | 9               | 0.09                                 | 0.19  | 938,308                            | 752,864   |
| CH505TF.N279K.G458Y       | <1 <sup>4</sup>                        | <1 <sup>4</sup> | <0.002                               | <0.02 | 145,732                            | 19,726    |
| CH505TF.N279K.G458Y.N280D | 14                                     | <1 <sup>4</sup> | 0.03                                 | <0.02 | 759,184                            | 119,464   |
| CH505.w4.3                | 4                                      | 47              | 0.01                                 | 1     | 1,192,674                          | ND        |

<sup>1</sup>Env-pseudotyped viruses were produced by transfection in either 293T or 293S/GnT1-cells. TZM-bl cells were incubated with ten 5-fold dilutions of the virus in quadruplicate. Relative luminescence units (RLU) were measured after 2 days as described in Methods.

<sup>2</sup>Relative to CH505TF.

<sup>3</sup>Undiluted virus (50 ul) added to 200 ul of TZM-bl cells at the start of the dilution series.

<sup>4</sup>Undiluted virus yielded <150,000 RLU.

<sup>5</sup>ND, not determined because the dose resulted in extensive virus-induced cell killing.
