# Supplementary material for: Neutralization-guided design of HIV-1 envelope trimers with high affinity for the unmutated common ancestor of CH235 lineage CD4bs broadly neutralizing antibodies
Source: PubMed Central journal article supplement (PMC6764681; doi:10.1371/journal.ppat.1008026), 2019-09-17
Supplement: ppat.1008026.s002.pdf [file ppat.1008026.s002.pdf]

**S2 Table. Impact of amino acids other than lysine (K) at position 279 and tyrosine (Y) at position 458 of CH505TF**

**TIER PHENOYTYPING (All viruses produced in GnT1<sup>-</sup> cells)**

| Mutation in CH505TF.G458Y/GnT1-  | ID50 (dilution) in T2M-bl cells |                 |                 |                 |                 | GMT <sup>1</sup> | Tier |
|----------------------------------|---------------------------------|-----------------|-----------------|-----------------|-----------------|------------------|------|
|                                  | CHAVI-0293pool2                 | CHAVI-0537pool2 | CHAVI-0642pool2 | CHAVI-0461pool2 | CHAVI-0598pool2 |                  |      |
| N279K                            | 50                              | 111             | 36              | 178             | 786             | 123              | 2    |
| N279A                            | 59                              | 125             | 64              | 100             | 391             | 113              | 2    |
| N279V                            | 56                              | 93              | 68              | 179             | 411             | 121              | 2    |
| N279Y                            | 47                              | 99              | 61              | 68              | 253             | 87               | 2    |
| N279W                            | 62                              | 79              | 69              | 127             | 402             | 112              | 2    |
| N279S                            | 34                              | 54              | 27              | 47              | 293             | 58               | 2    |
| N279T                            | 110                             | 155             | 90              | 257             | 8683            | 321              | 2    |
| N279C                            | 83                              | 128             | 79              | 262             | 1905            | 211              | 2    |
| N279M                            | 143                             | 256             | 123             | 261             | 2142            | 302              | 2    |
| N279L                            | 97                              | 147             | 80              | 336             | 1244            | 217              | 2    |
| N279R                            | 47                              | 76              | 35              | 77              | 432             | 84               | 2    |
| N279H                            | <30                             | 79              | <30             | 70              | 476             | 57               | 2    |
| N279D                            | 54                              | 121             | 47              | 90              | 608             | 111              | 2    |
| N279E                            | 143                             | 308             | 131             | 333             | 2360            | 340              | 2    |
| N279Q                            | 55                              | 127             | 60              | 180             | 327             | 120              | 2    |
| <b>Mutation in CH505TF/GnT1-</b> |                                 |                 |                 |                 |                 |                  |      |
| G458Y                            | 43                              | 89              | 36              | 66              | 382             | 81               | 2    |
| G458F                            | 89                              | 184             | 99              | 151             | 463             | 163              | 2    |
| G458W                            | 50                              | 99              | 46              | 85              | 329             | 91               | 2    |
| G458R                            | 64                              | 122             | 60              | 114             | 394             | 116              | 2    |
| G458K                            | 87                              | 148             | 114             | 171             | 546             | 169              | 2    |
| G458C                            | 154                             | 165             | 143             | 163             | 570             | 202              | 2    |
| G458L                            | 151                             | 173             | 121             | 181             | 620             | 204              | 2    |
| G458S                            | 125                             | 100             | 69              | 74              | 454             | 124              | 2    |
| G458D                            | 391                             | 494             | 356             | 651             | 1705            | 598              | 1B   |
| G458E                            | 96                              | 106             | 75              | 64              | 598             | 124              | 2    |
| CH0505TF.N279K.G458C             | 1032                            | 271             | 469             | 1846            | 1244            | 787              | 1B   |
| CH0505TF.N279K.G458L             | 1893                            | 891             | 883             | 672             | 1197            | 1037             | 1B   |
| G458Y.N280D                      | 30                              | 35              | <30             | <30             | 162             | 33               | 2    |

**CH235 LINEAGE PHENOTYPING (All viruses produced in GnT1<sup>-</sup> cells)**

| Mutation in CH505TF.G458Y/GnT1-  | IC50 (µg/ml) in T2M-bl cells |                |                |                  |        |
|----------------------------------|------------------------------|----------------|----------------|------------------|--------|
|                                  | CH235 UCA2                   | CH235 I4 v2 4A | CH235 I3 v2 4A | CH235VH I1 v2 4A | CH235  |
| N279K                            | 0.02                         | 0.05           | 0.011          | 0.003            | 0.002  |
| N279A                            | 8.46                         | 0.05           | 0.009          | 0.004            | 0.002  |
| N279V                            | 26                           | 0.04           | 0.008          | 0.007            | 0.002  |
| N279Y                            | 0.04                         | 0.011          | 0.011          | 0.008            | 0.002  |
| N279W                            | 0.22                         | 0.02           | 0.007          | 0.004            | 0.001  |
| N279S                            | >50                          | 0.16           | 0.001          | 0.007            | 0.001  |
| N279T                            | 4.35                         | 0.02           | 0.009          | 0.007            | 0.003  |
| N279C                            | 1.38                         | 0.04           | 0.018          | 0.008            | 0.005  |
| N279M                            | 0.12                         | 0.005          | 0.005          | 0.005            | 0.002  |
| N279L                            | 0.23                         | 0.018          | 0.009          | 0.008            | 0.003  |
| N279R                            | 0.05                         | 0.004          | 0.006          | 0.003            | 0.001  |
| N279H                            | 1.26                         | 0.034          | 0.013          | 0.011            | 0.002  |
| N279D                            | >50                          | >50            | 0.068          | 0.036            | 0.005  |
| N279E                            | >50                          | 0.71           | 0.032          | 0.014            | 0.004  |
| N279Q                            | 0.62                         | 0.004          | 0.007          | 0.006            | 0.006  |
| <b>Mutation in CH505TF/GnT1-</b> |                              |                |                |                  |        |
| G458Y                            | 35.5                         | 0.08           | 0.03           | 0.012            | 0.011  |
| G458F                            | >50                          | 0.720          | 0.020          | 0.020            | 0.003  |
| G458W                            | >50                          | 0.340          | 0.009          | 0.008            | 0.002  |
| G458R                            | >10                          | 0.470          | 0.025          | 0.013            | 0.009  |
| G458K                            | >50                          | 2.180          | 0.074          | 0.026            | 0.022  |
| G458C                            | 6.390                        | 0.017          | 0.040          | 0.015            | 0.009  |
| G458L                            | 8.660                        | 0.150          | 0.033          | 0.018            | 0.015  |
| G458S                            | >50                          | 2.980          | 0.042          | 0.014            | 0.005  |
| G458D                            | >50                          | >50            | 0.063          | 0.005            | 0.011  |
| G458E                            | >50                          | >50            | 0.074          | 0.020            | 0.012  |
| CH0505TF.N279K.G458C             | 0.018                        | 0.006          | 0.015          | 0.006            | 0.001  |
| CH0505TF.N279K.G458L             | 0.013                        | 0.002          | 0.011          | 0.006            | 0.0017 |
| G458Y.N280D                      | >50                          | >50            | 7.820          | 0.070            | 2.691  |

<sup>1</sup>GMT, geometric mean titer

**Weaker** **Stronger**

**Key:**

| Tier Classification | Range (ID50) |
|---------------------|--------------|
| 1A                  | >2000        |
| 1B                  | 350 - 2000   |
| 2                   | 50 - 350     |
| 3                   | <50          |
