# Supplementary material for: Neutralization-guided design of HIV-1 envelope trimers with high affinity for the unmutated common ancestor of CH235 lineage CD4bs broadly neutralizing antibodies
Source: PubMed Central journal article supplement (PMC6764681; doi:10.1371/journal.ppat.1008026), 2019-09-17
Supplement: ppat.1008026.s003.pdf [file ppat.1008026.s003.pdf]

**S3 Table. Cryo-EM data collection and refinement statistics**

| CH505.N279K.G458Y.SOSIP.664<br>+CH235 UCA2      |                 |
|-------------------------------------------------|-----------------|
| <hr/>                                           |                 |
| Data Collection                                 |                 |
| Microscope                                      | FEI Titan Krios |
| Voltage (kV)                                    | 300             |
| Electron dose (e <sup>-</sup> /Å <sup>2</sup> ) | 42              |
| Detector                                        | Falcon 3        |
| Pixel Size (Å)                                  | 1.08            |
| Defocus Range (µm)                              | ~1.5-3          |
| Magnification                                   | 75000           |
|                                                 |                 |
| Reconstruction                                  |                 |
| Software                                        | cryoSparc       |
| Particles                                       | 22093           |
| Symmetry                                        | C3              |
| Box size (pix)                                  | 320             |
| Resolution (Å) (FSC0.143) <sup>§</sup>          | 4.2             |
|                                                 |                 |
| Refinement (Phenix)                             |                 |
| Protein residues                                | 3054            |
| Chimera CC                                      | 0.85            |
| R.m.s. deviations                               |                 |
| Bond lengths (Å)                                | 0.006           |
| Bond angles (°)                                 | 0.946           |
|                                                 |                 |
| Validation                                      |                 |
| Molprobit score                                 | 1.0             |
| Clash score                                     | 1.4             |
| Favored rotamers (%)                            | 99.0            |
| Ramachandran                                    |                 |
| Favored regions (%)                             | 97.1            |
| Disallowed regions (%)                          | 0.5             |
| EMRinger score                                  | 1.47            |
| <hr/>                                           |                 |

<sup>1</sup>Resolutions are reported according to the FSC 0.143 gold-standard criterion
