# Supplementary material for: Neutralization-guided design of HIV-1 envelope trimers with high affinity for the unmutated common ancestor of CH235 lineage CD4bs broadly neutralizing antibodies
Source: PubMed Central journal article supplement (PMC6764681; doi:10.1371/journal.ppat.1008026), 2019-09-17
Supplement: ppat.1008026.s004.pdf [file ppat.1008026.s004.pdf]

**S4 Table. S365P is a resistance mutation for the UCA and intermediates of CH103.**

| Antibody Name     | IC50 (µg/ml) in TZM-bl cells           |                                              |
|-------------------|----------------------------------------|----------------------------------------------|
|                   | CH505TF.gly4<br>293S GnT1 <sup>-</sup> | CH505TF.gly4.S365P<br>293S GnT1 <sup>-</sup> |
| CH103_UCA_4A/293i | 2.5                                    | >50                                          |
| CH103_IA_9_4A     | >50                                    | >50                                          |
| CH103_IA_8_4A     | 0.002                                  | >5                                           |
| CH103_IA_7_4A     | 0.001                                  | 0.54                                         |
| CH103_IA_6_4A     | 0.001                                  | 0.59                                         |
| CH103_IA_5_4A     | 0.002                                  | >5                                           |
| CH103_IA_4_4A     | 0.001                                  | 0.817                                        |
| CH103 (Mature)    | 0.002                                  | 0.002                                        |
| CH235.12          | 0.002                                  | 0.002                                        |
