# Supplementary material for: Neutralization-guided design of HIV-1 envelope trimers with high affinity for the unmutated common ancestor of CH235 lineage CD4bs broadly neutralizing antibodies
Source: PubMed Central journal article supplement (PMC6764681; doi:10.1371/journal.ppat.1008026), 2019-09-17

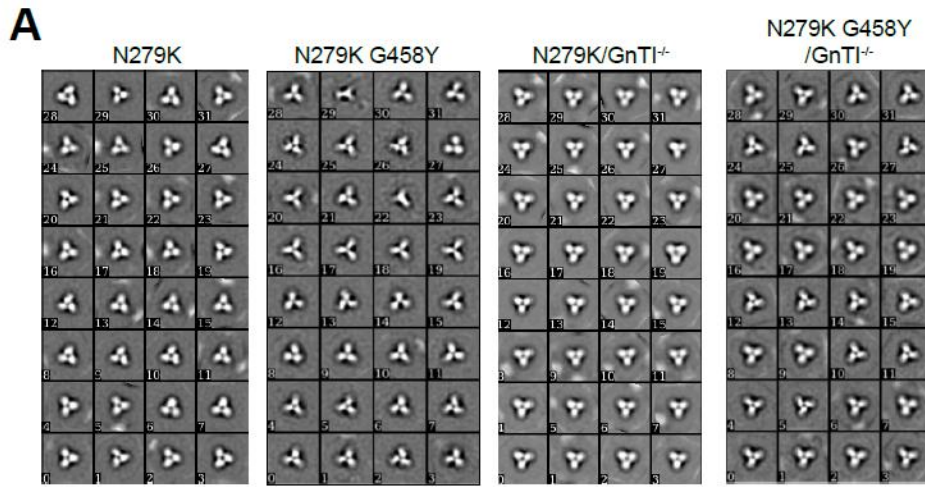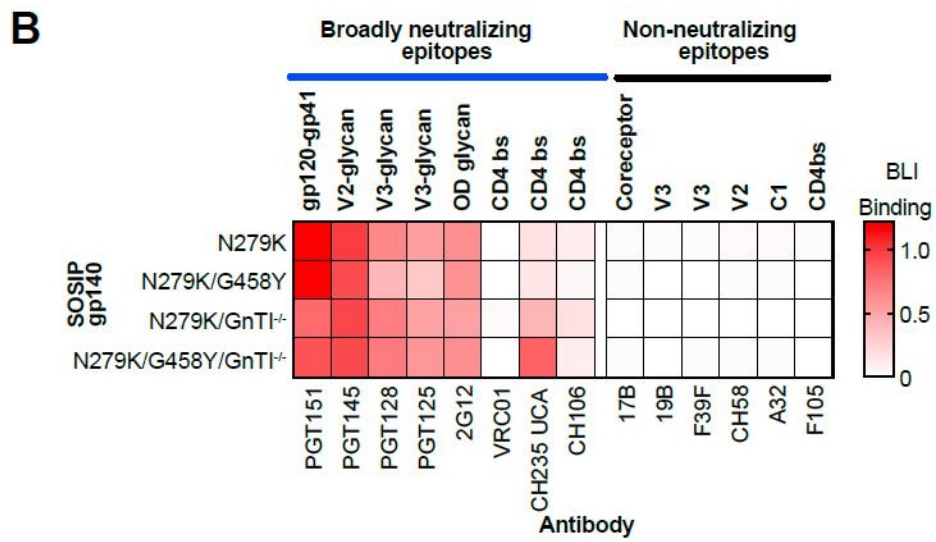

Supplement: ppat.1008026.s006.pdf [file ppat.1008026.s006.pdf]
