# Supplementary material for: Neutralization-guided design of HIV-1 envelope trimers with high affinity for the unmutated common ancestor of CH235 lineage CD4bs broadly neutralizing antibodies
Source: PubMed Central journal article supplement (PMC6764681; doi:10.1371/journal.ppat.1008026), 2019-09-17
Supplement: ppat.1008026.s007.pdf [file ppat.1008026.s007.pdf]

### CH505TF SOSIP.664 v4.1\_G458Y/GnT1-

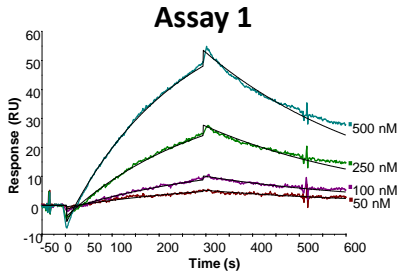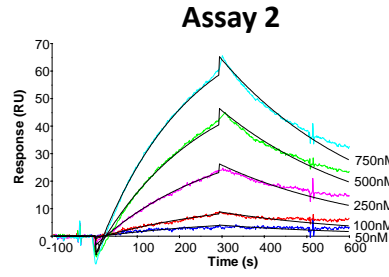

| G458Y/GnT1- |                          |                     |            |
|-------------|--------------------------|---------------------|------------|
|             | $K_a$ ( $M^{-1}s^{-1}$ ) | $k_d$ ( $s^{-1}$ )  | $K_D$ (nM) |
| Assay 1     | $0.32 \times 10^4$       | $26 \times 10^{-4}$ | 822        |
| Assay 2     | $0.24 \times 10^4$       | $28 \times 10^{-4}$ | 1170       |
| Average     |                          |                     | 996        |

### CH505TF SOSIP.664 v4.1\_N279K/293F

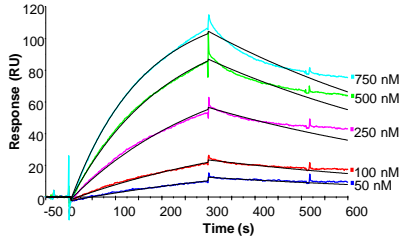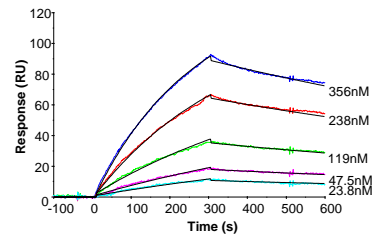

| N279K/293F |                          |                     |            |
|------------|--------------------------|---------------------|------------|
|            | $K_a$ ( $M^{-1}s^{-1}$ ) | $k_d$ ( $s^{-1}$ )  | $K_D$ (nM) |
| Assay 1    | $0.66 \times 10^4$       | $15 \times 10^{-4}$ | 231        |
| Assay 2    | $0.91 \times 10^4$       | $7 \times 10^{-4}$  | 77         |
| Average    |                          |                     | 154        |

### CH505TF SOSIP.664 v4.1\_N279K.G458Y/293F

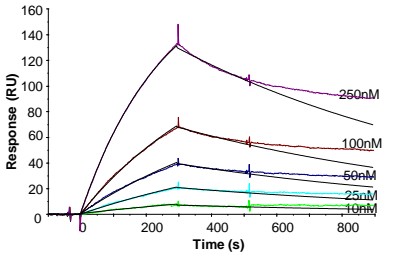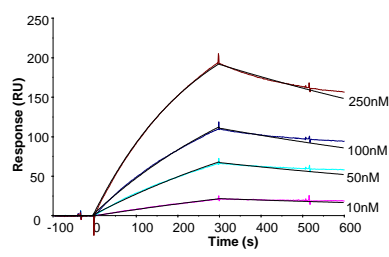

| N279K.G458Y/293F |                          |                     |            |
|------------------|--------------------------|---------------------|------------|
|                  | $K_a$ ( $M^{-1}s^{-1}$ ) | $k_d$ ( $s^{-1}$ )  | $K_D$ (nM) |
| Assay 1          | $1.17 \times 10^4$       | $10 \times 10^{-4}$ | 89         |
| Assay 2          | $1.20 \times 10^4$       | $9 \times 10^{-4}$  | 77         |
| Average          |                          |                     | 83         |

### CH505TF SOSIP.664 v4.1\_N279K/GnT1-

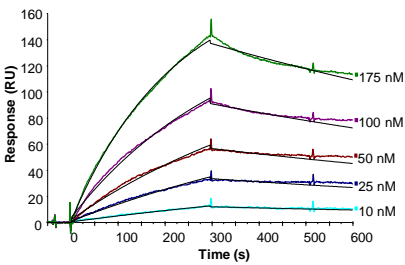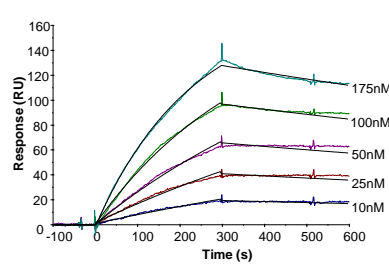

| N279K/GnT1- |                          |                    |            |
|-------------|--------------------------|--------------------|------------|
|             | $K_a$ ( $M^{-1}s^{-1}$ ) | $k_d$ ( $s^{-1}$ ) | $K_D$ (nM) |
| Assay 1     | $1.18 \times 10^4$       | $8 \times 10^{-4}$ | 35         |
| Assay 2     | $2.25 \times 10^4$       | $4 \times 10^{-4}$ | 20         |
| Average     |                          |                    | 28         |

### CH505TF SOSIP.664 v4.1\_N279K.G458Y/GnT1-

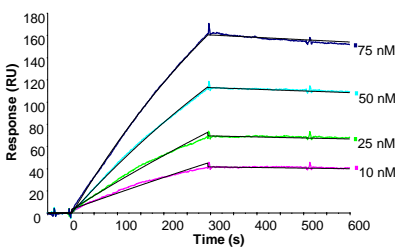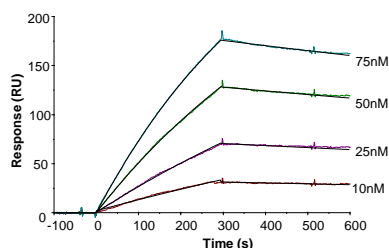

| N279K.G458Y/GnT1- |                          |                    |            |
|-------------------|--------------------------|--------------------|------------|
|                   | $K_a$ ( $M^{-1}s^{-1}$ ) | $k_d$ ( $s^{-1}$ ) | $K_D$ (nM) |
| Assay 1           | $2.29 \times 10^4$       | $1 \times 10^{-4}$ | 6          |
| Assay 2           | $2.70 \times 10^4$       | $3 \times 10^{-4}$ | 11         |
| Average           |                          |                    | 9          |
