# Supplementary material for: Neutralization-guided design of HIV-1 envelope trimers with high affinity for the unmutated common ancestor of CH235 lineage CD4bs broadly neutralizing antibodies
Source: PubMed Central journal article supplement (PMC6764681; doi:10.1371/journal.ppat.1008026), 2019-09-17

**A** Representative micrograph

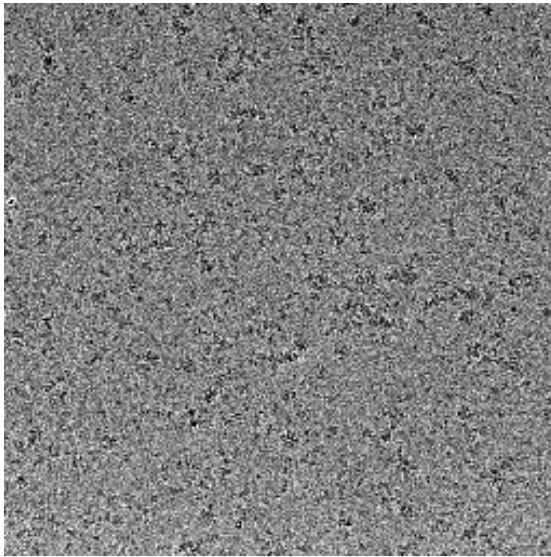

**B** Initial representative 2D class averages

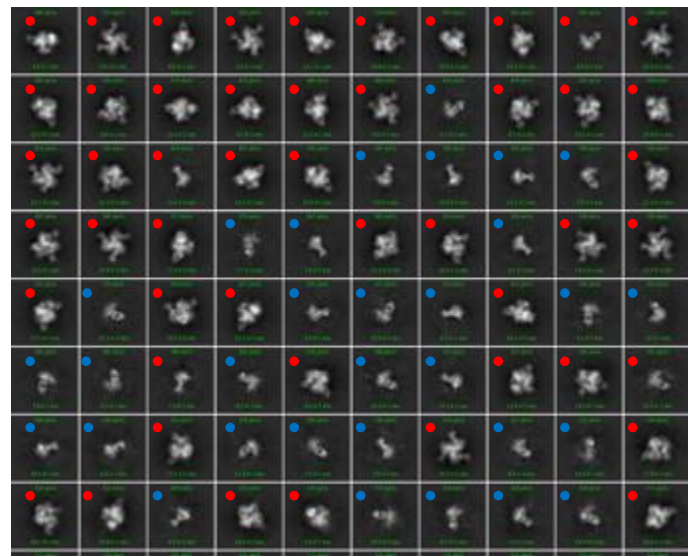

● Larger particles  
● Smaller particles

**C** Final representative 2D class averages

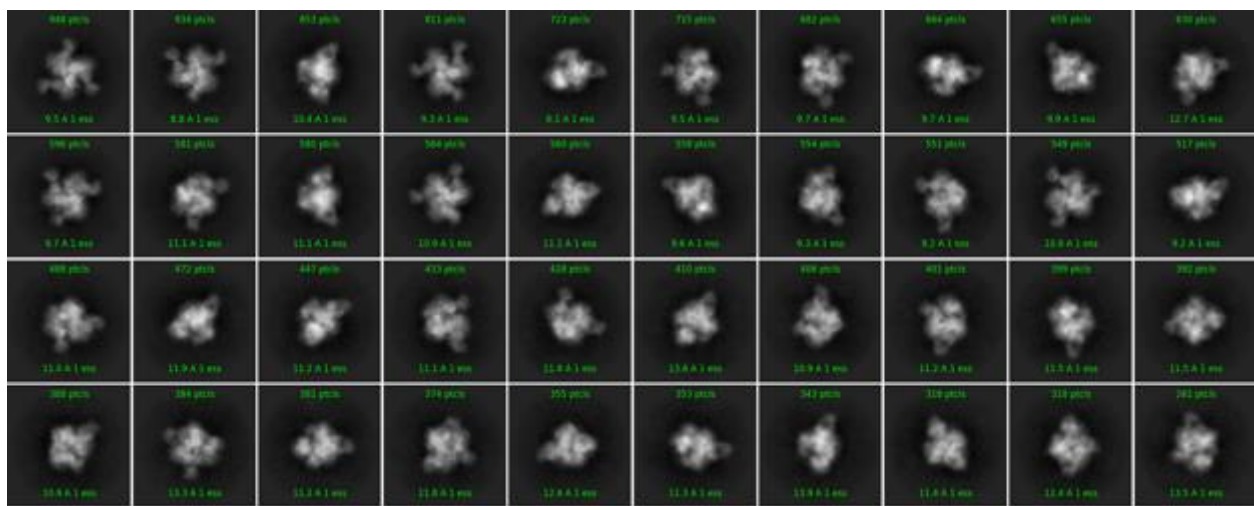

**D** *Ab initio* model (C1 symmetry)

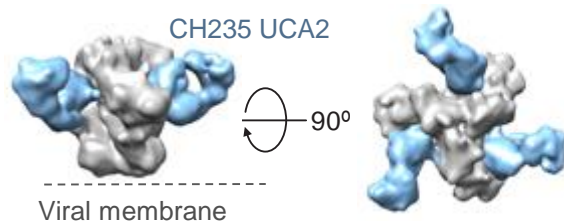

**E** Refined map with fitted model (C3 symmetry applied)

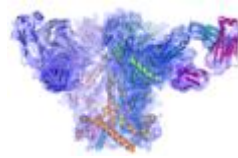

**F** Fourier shell correlation curve

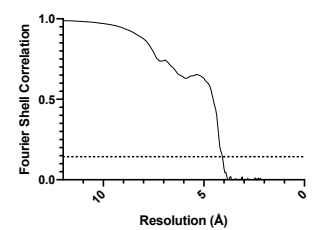

Supplement: ppat.1008026.s008.pdf [file ppat.1008026.s008.pdf]
